# Supplementary material for: Calix[4]arene-functionalized poly-cyclopenta[2,1-b;3,4-b′]bithiophenes with good recognition ability and selectivity for small organic molecules for application in QCM-based sensors
Source: Royal Society of Chemistry journal article supplement (doi:10.1039/b314345g), 2004-01-01
Supplement: b314345g.doc [file b314345g.doc]

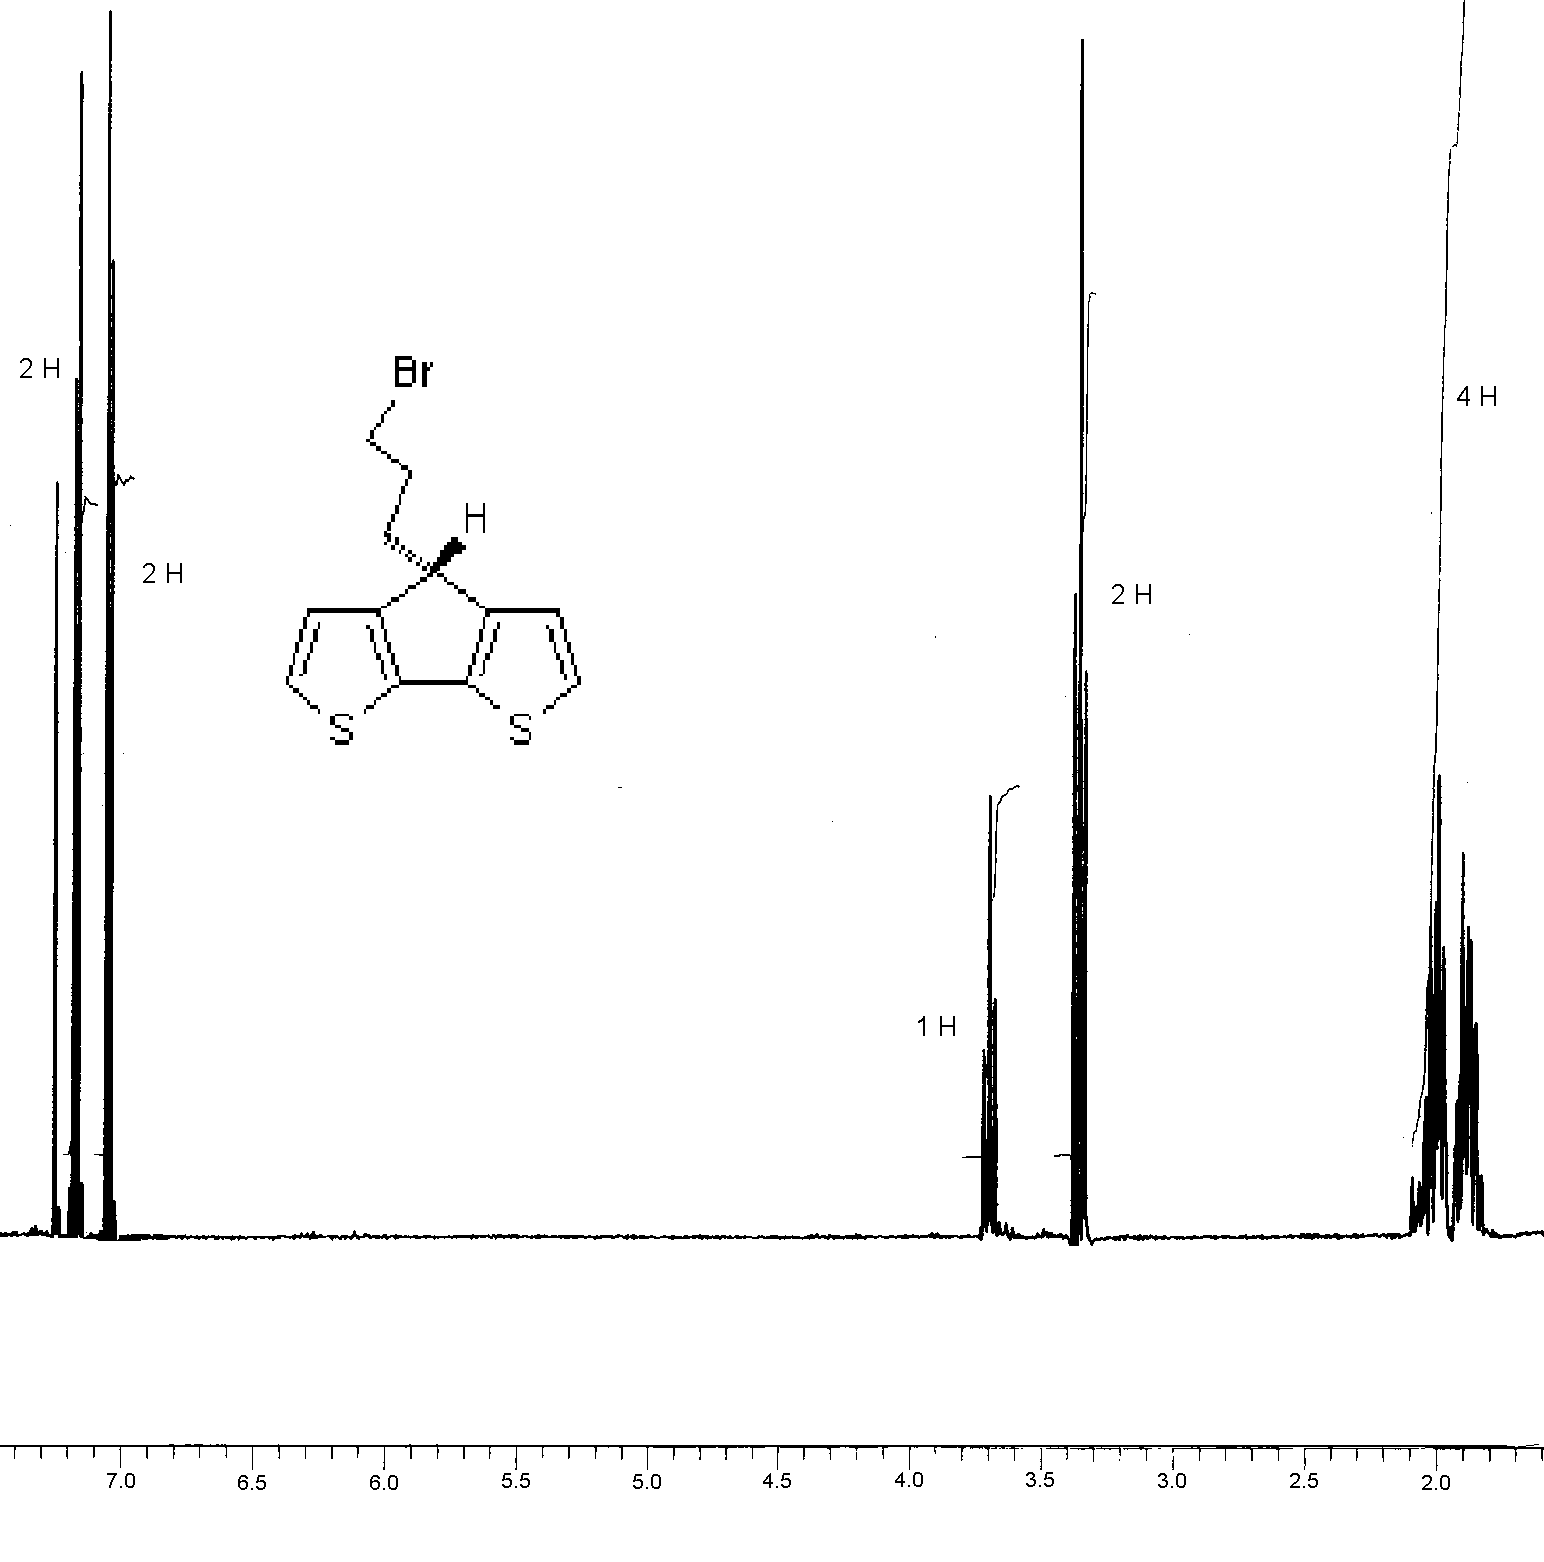


1H-NMR Spectrum of **6** (CDCl3) at 26 °C


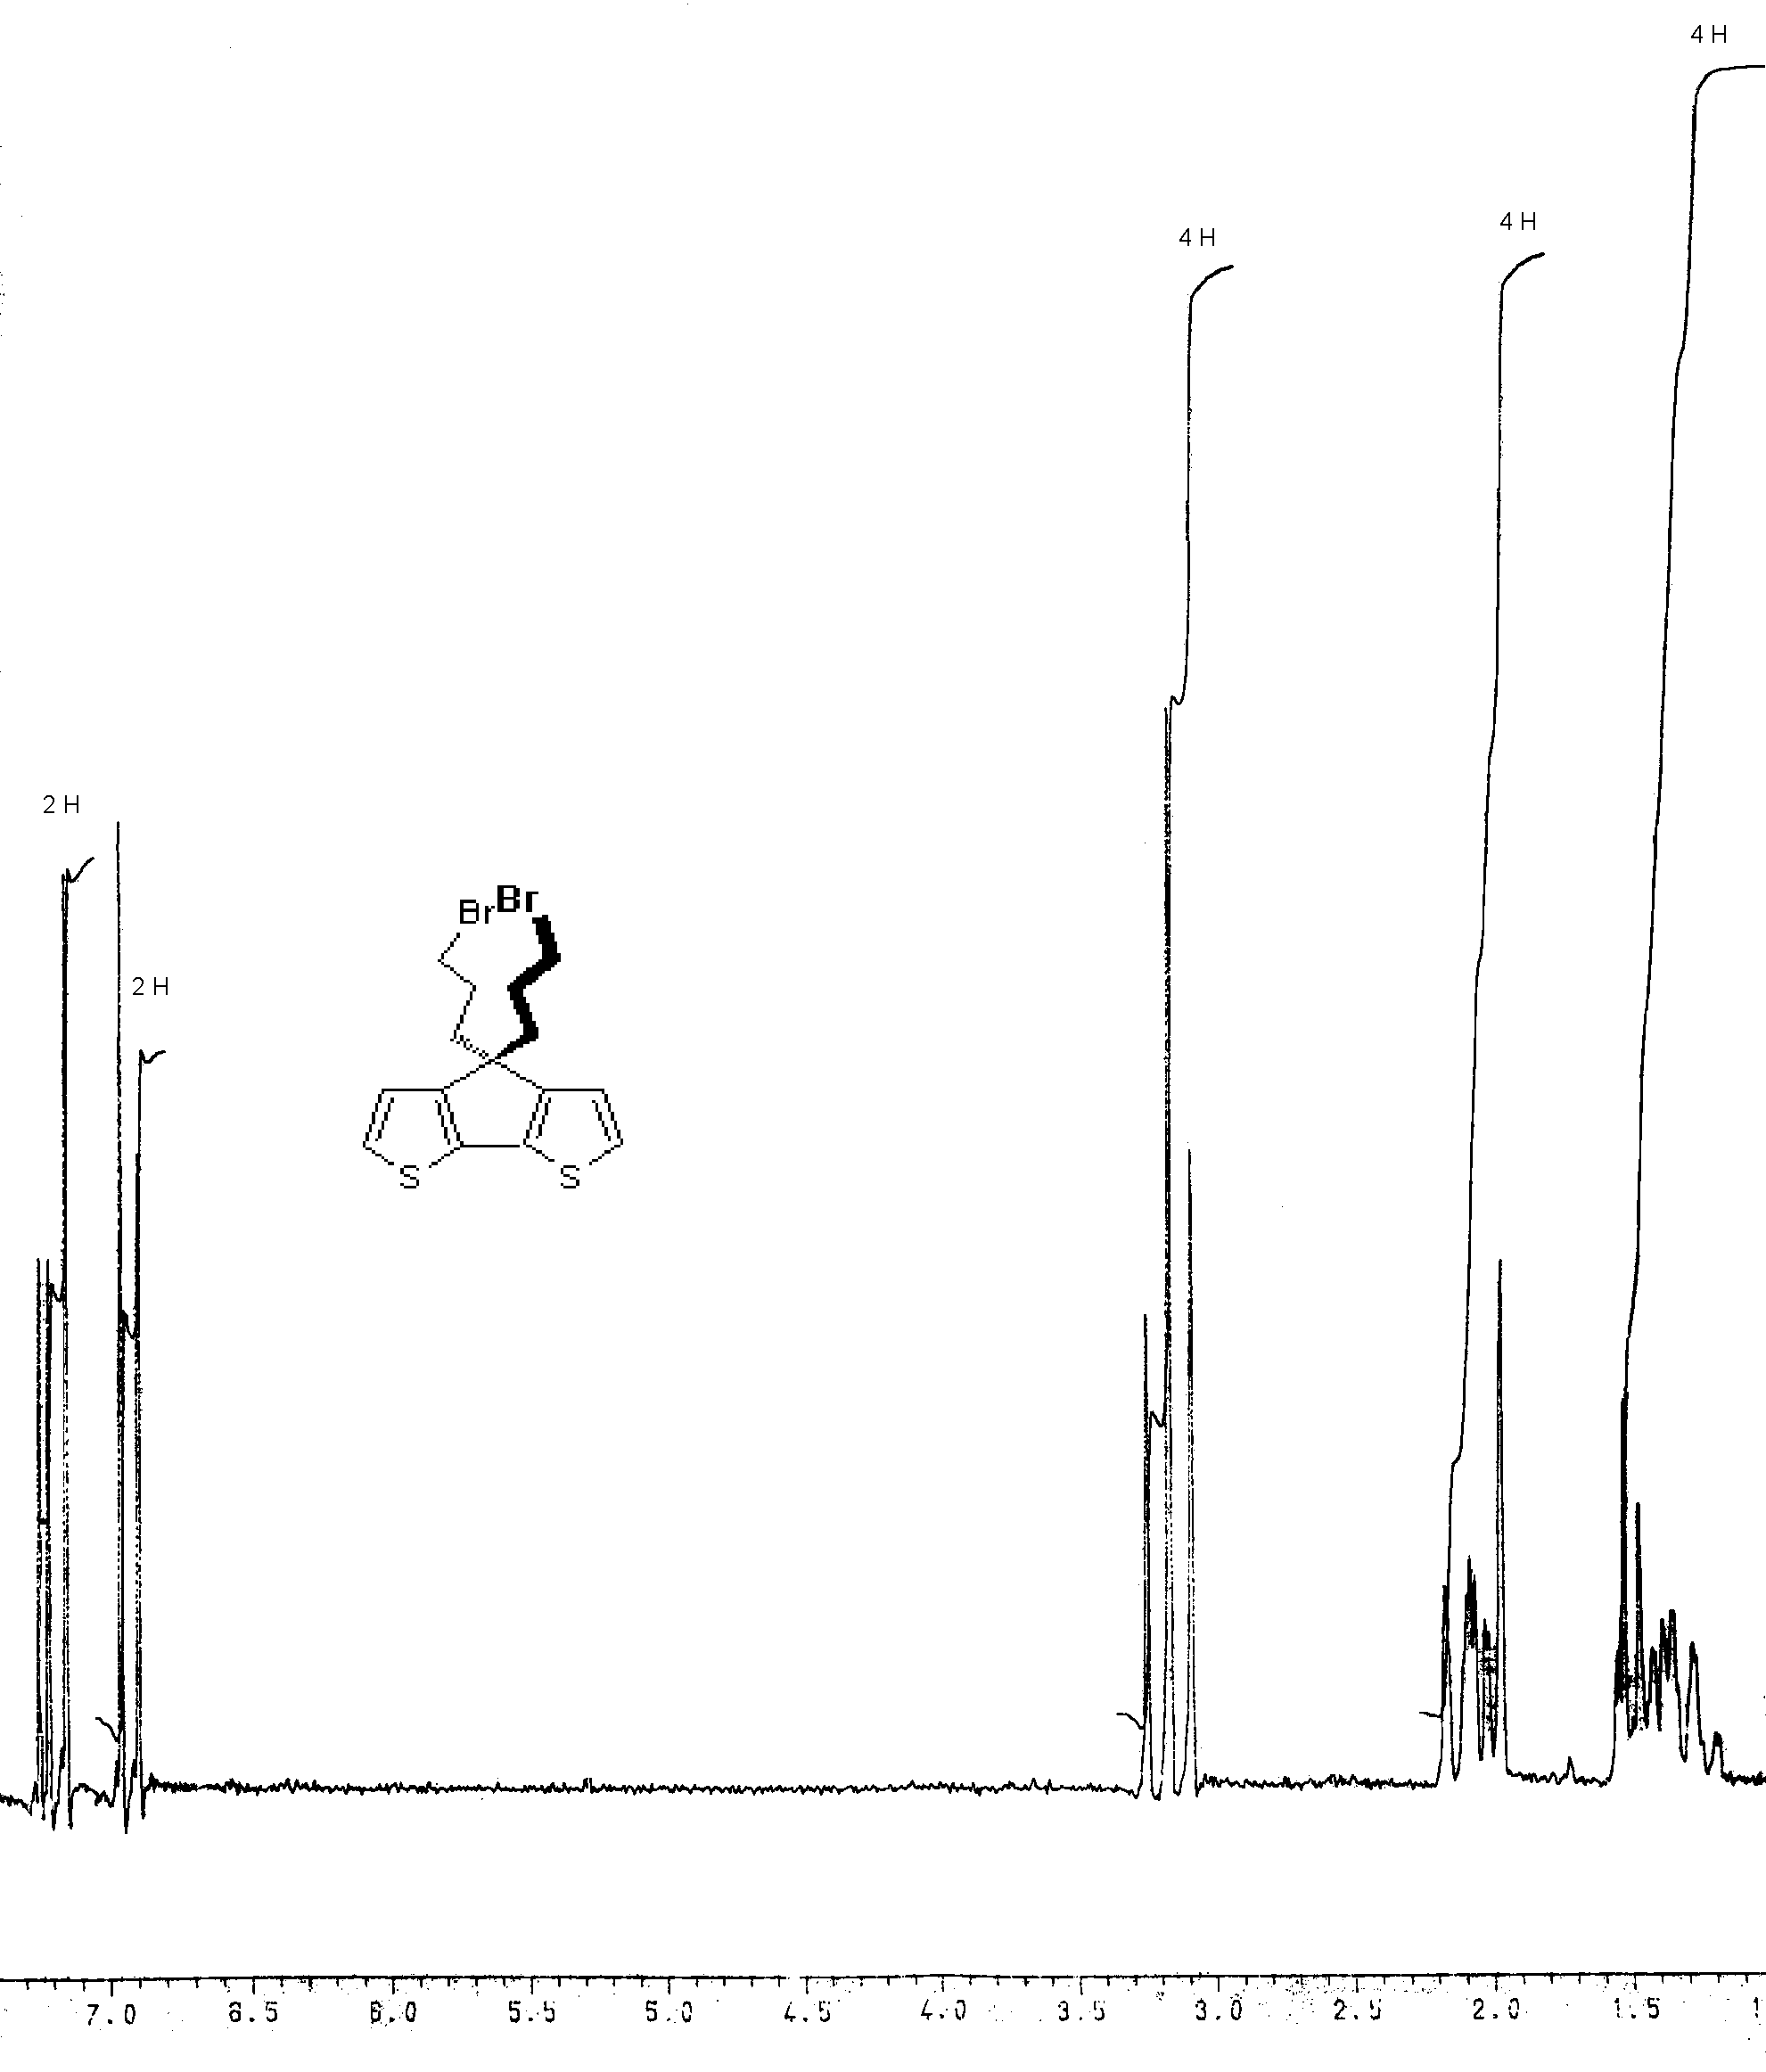


1H-NMR Spectrum of **7** (CDCl3) at 26 °C


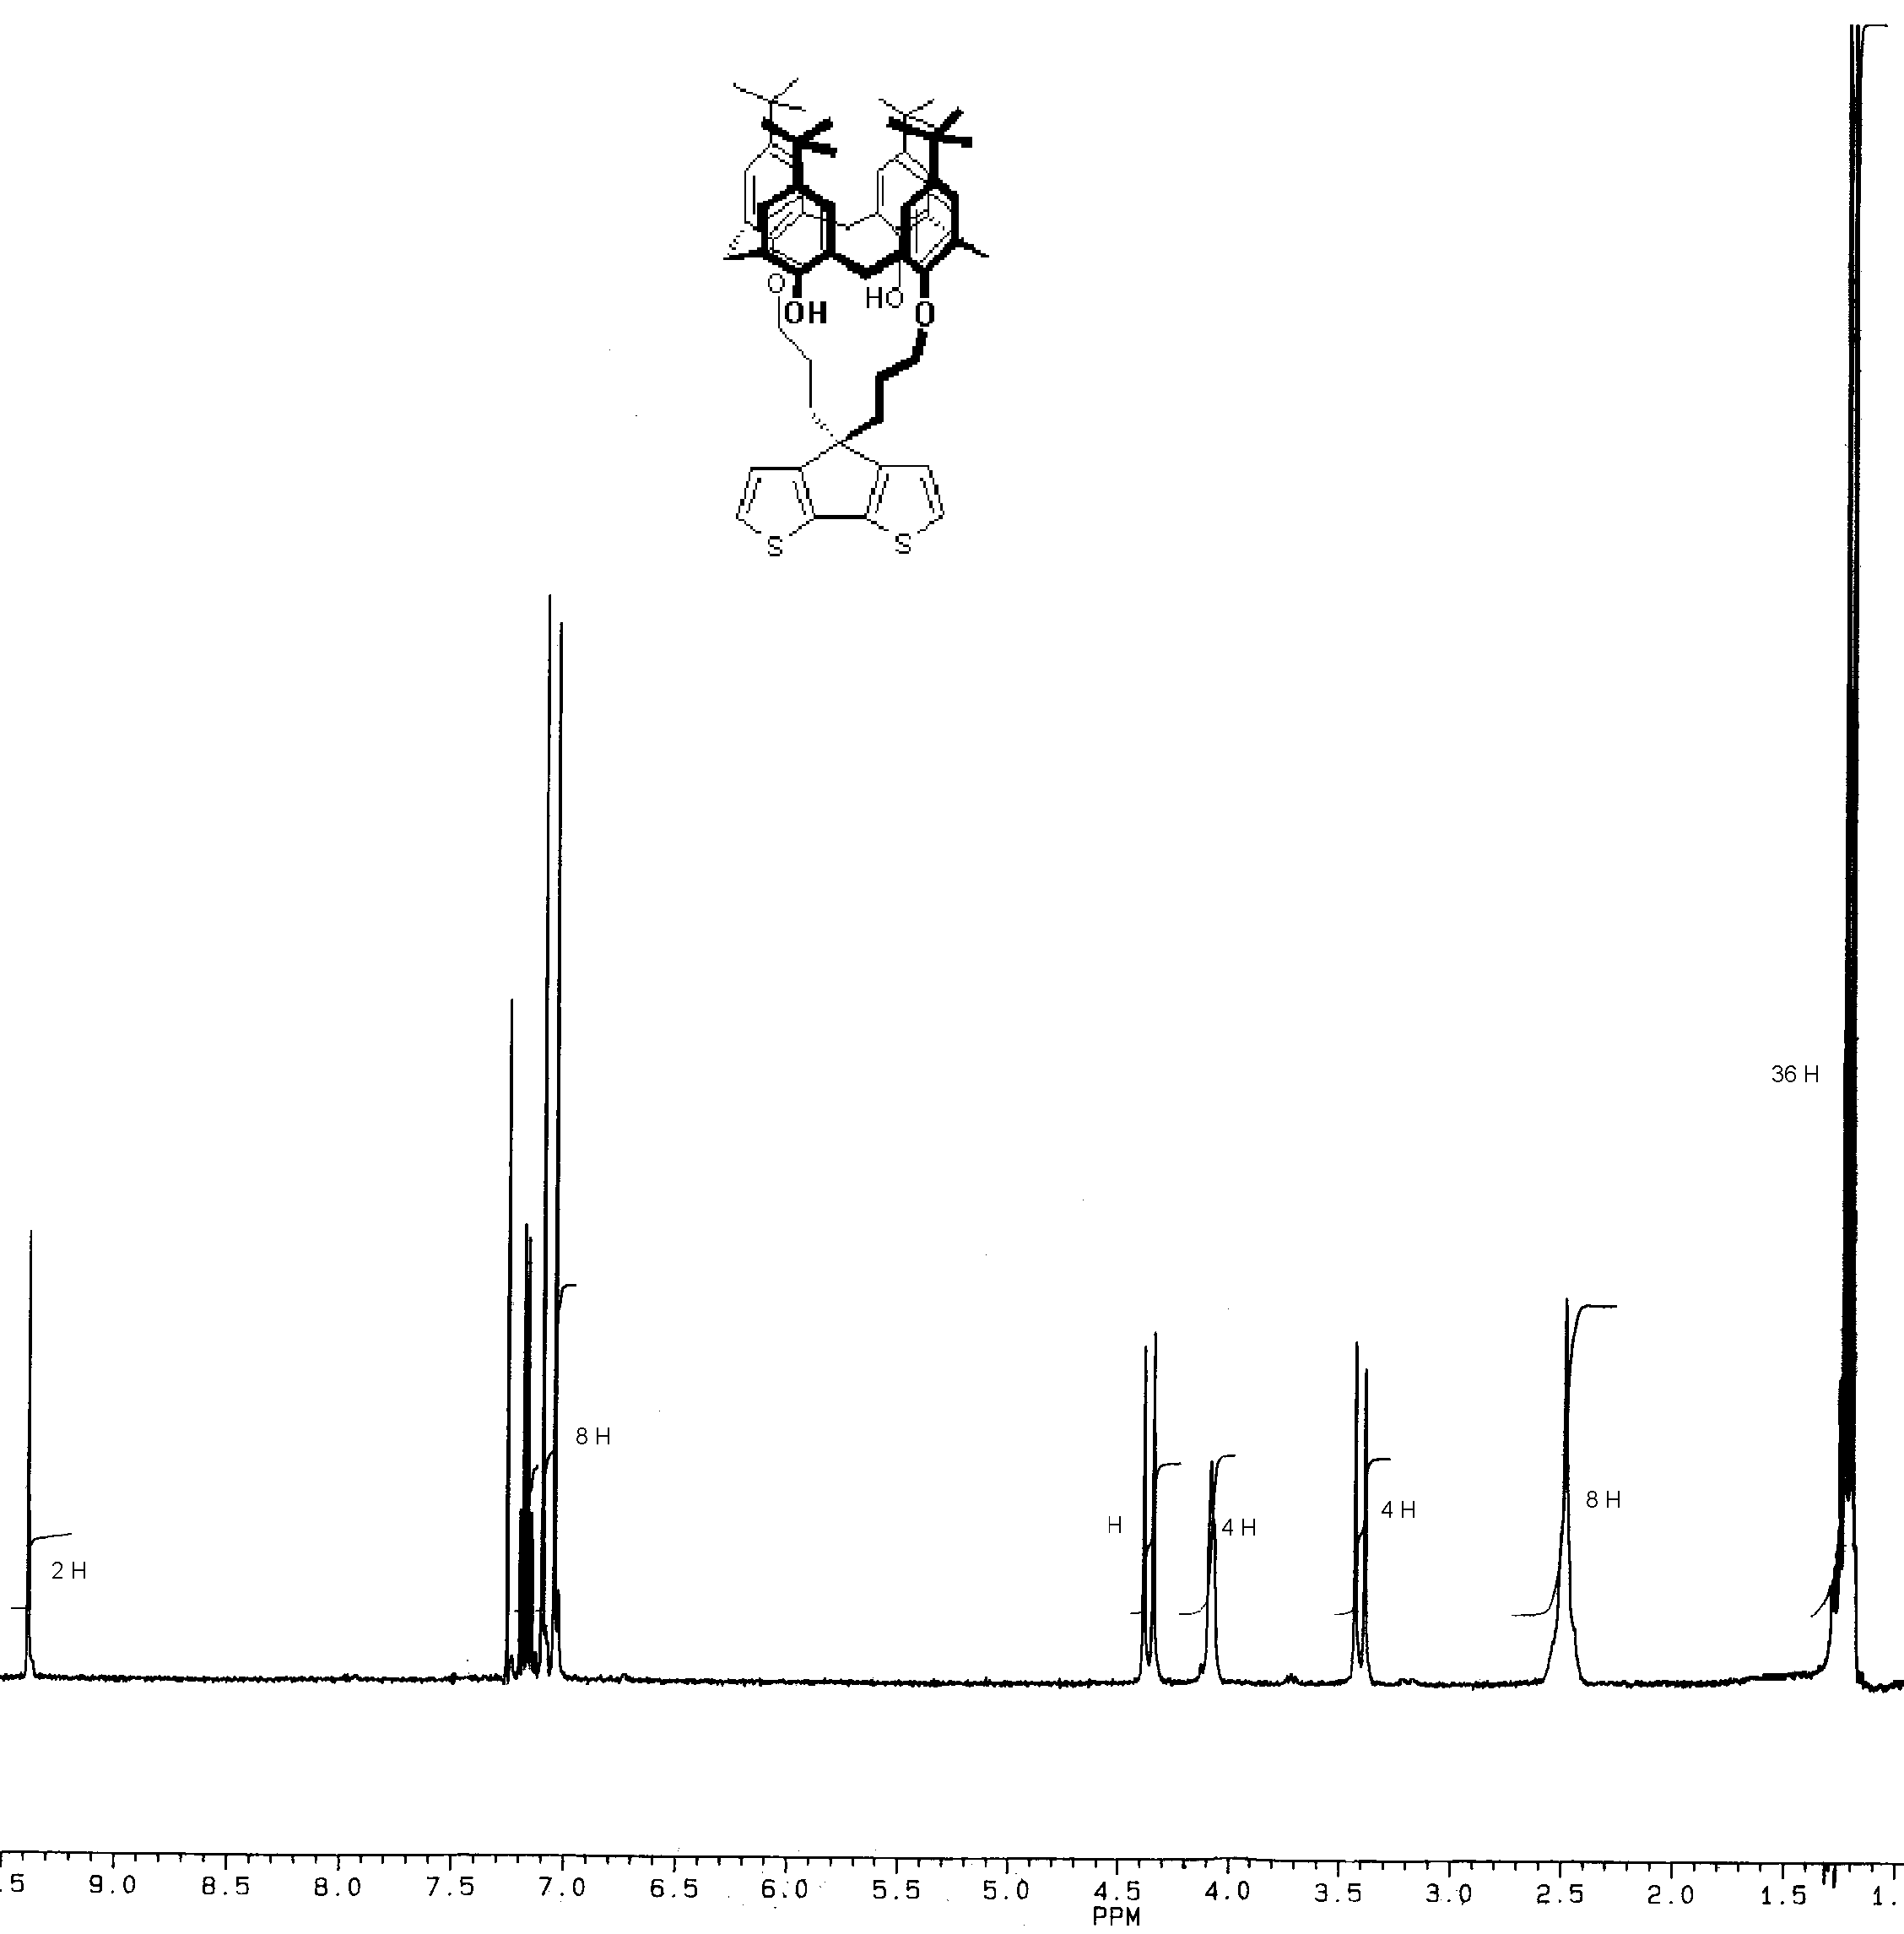


1H-NMR Spectrum of **8** (CDCl3) at 26 °C


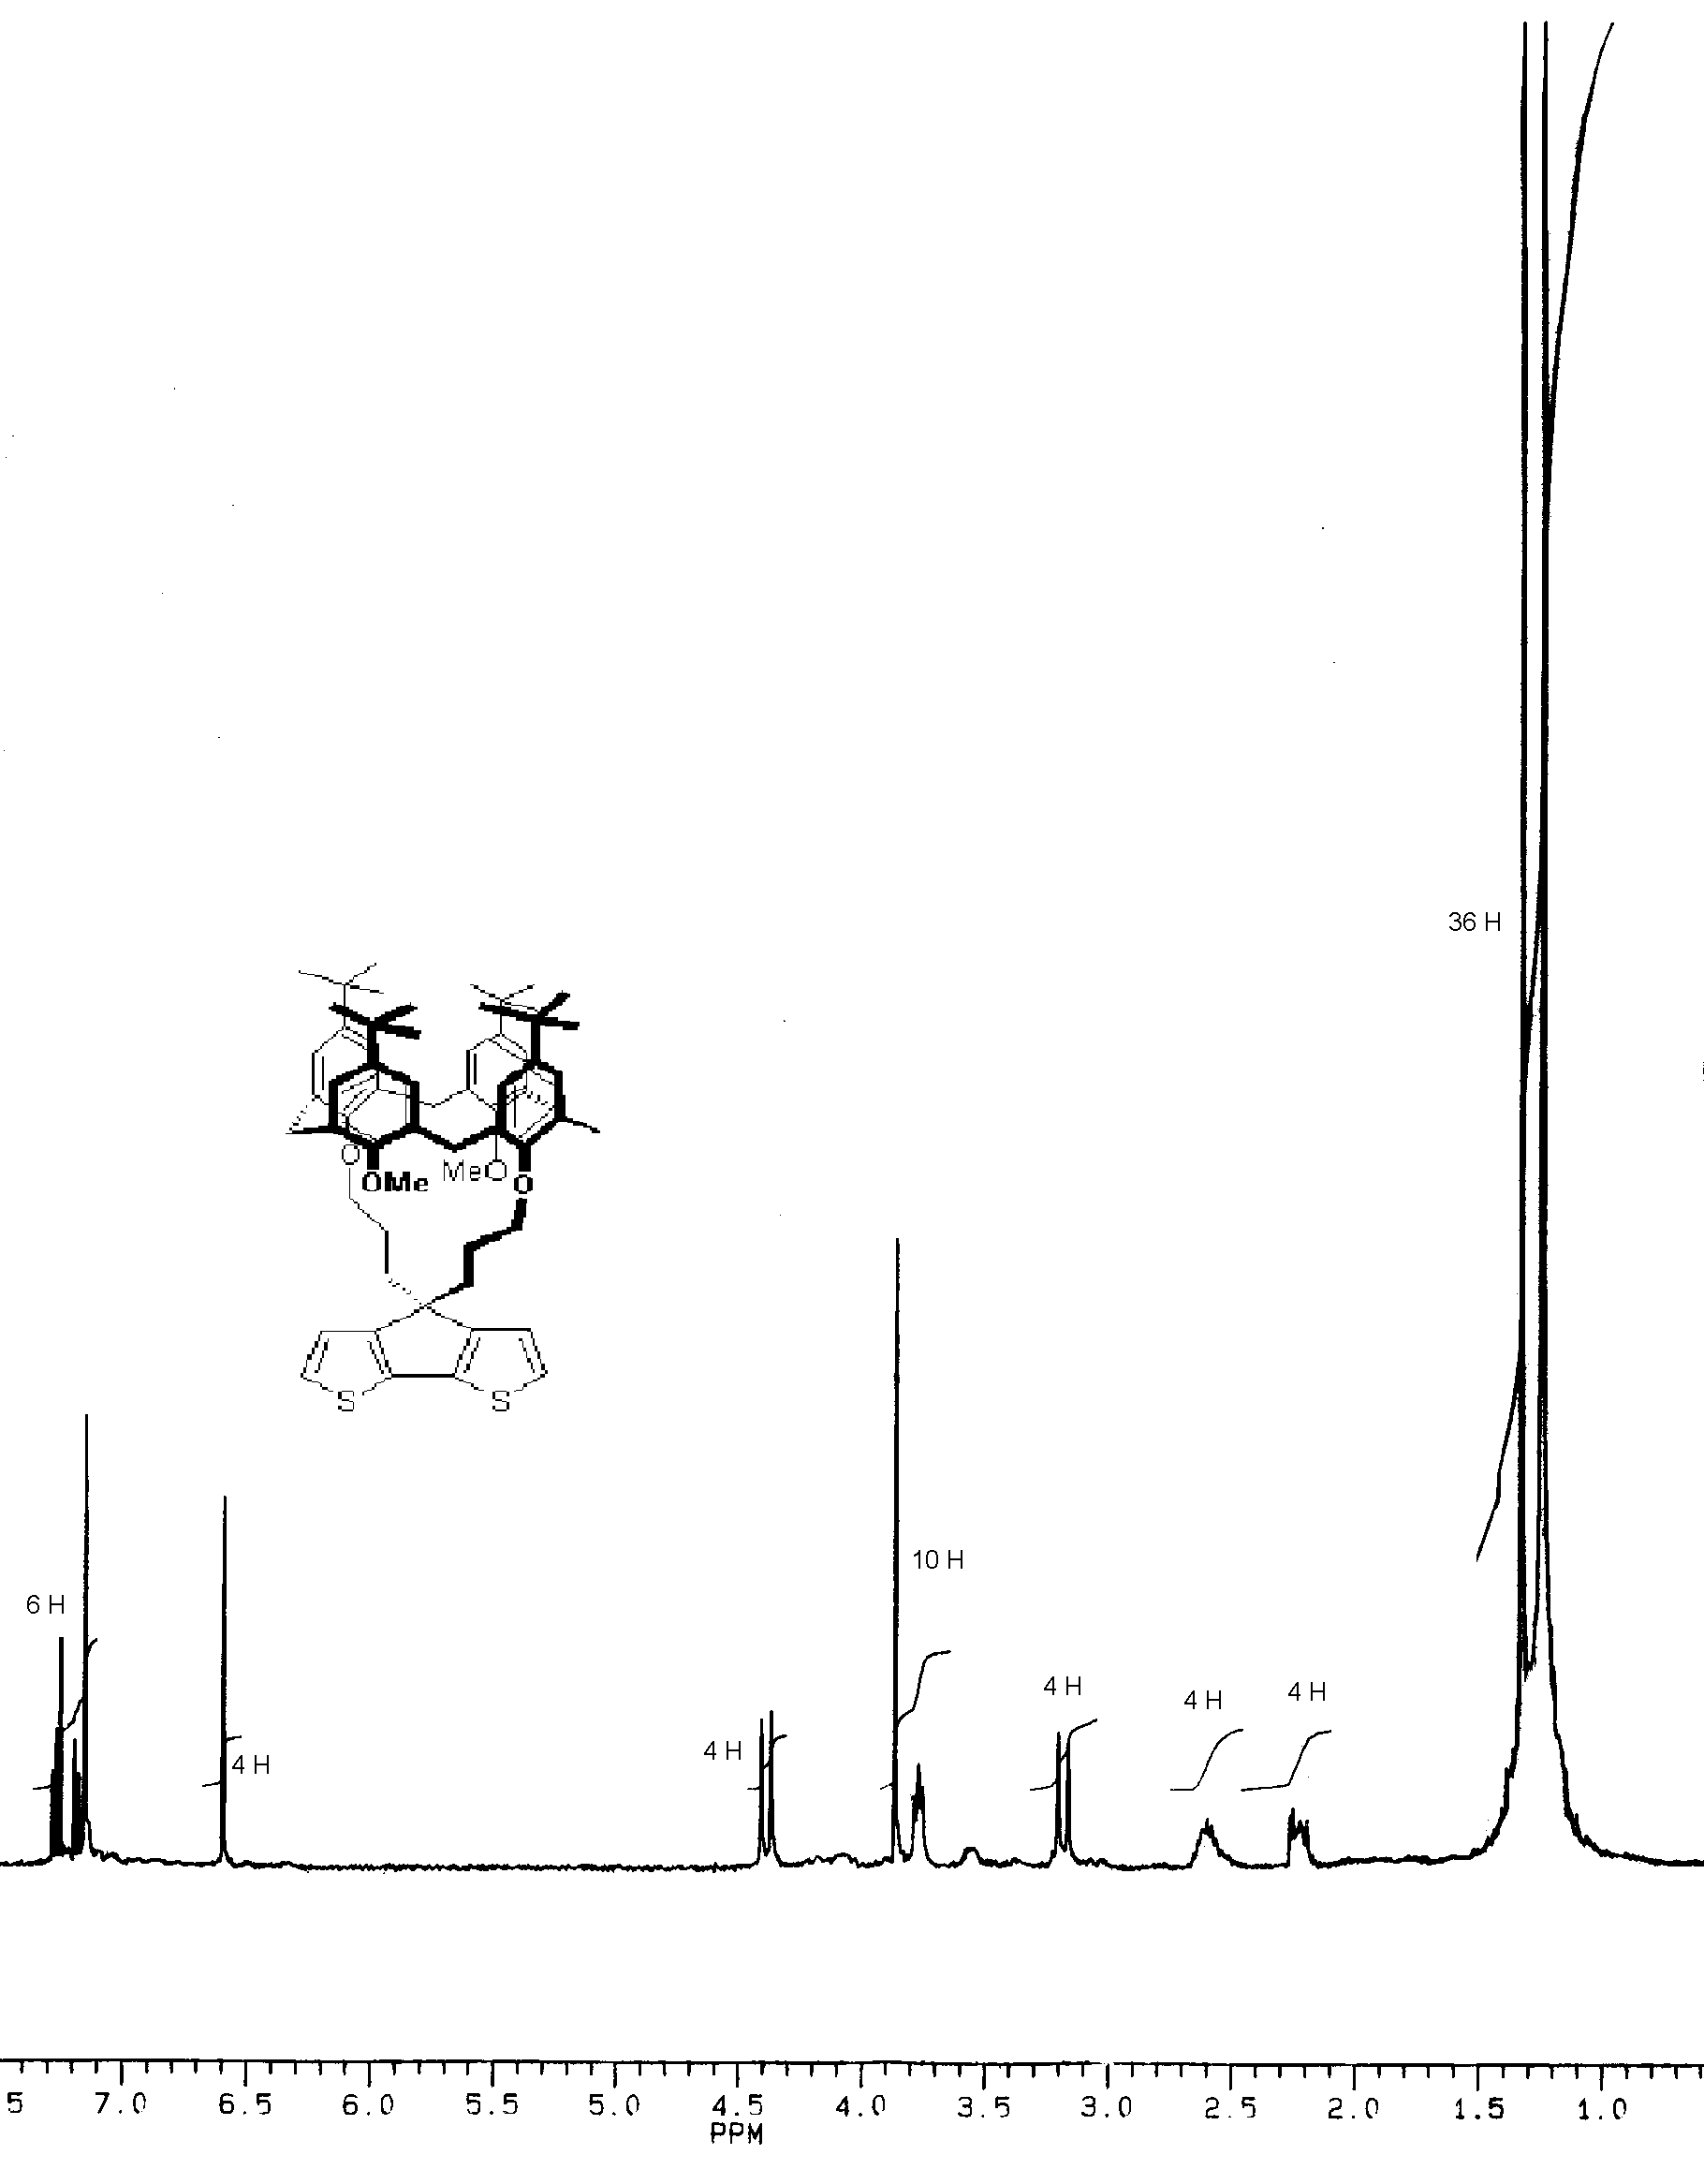


1H-NMR Spectrum of **1** (CDCl3) at 26 °C


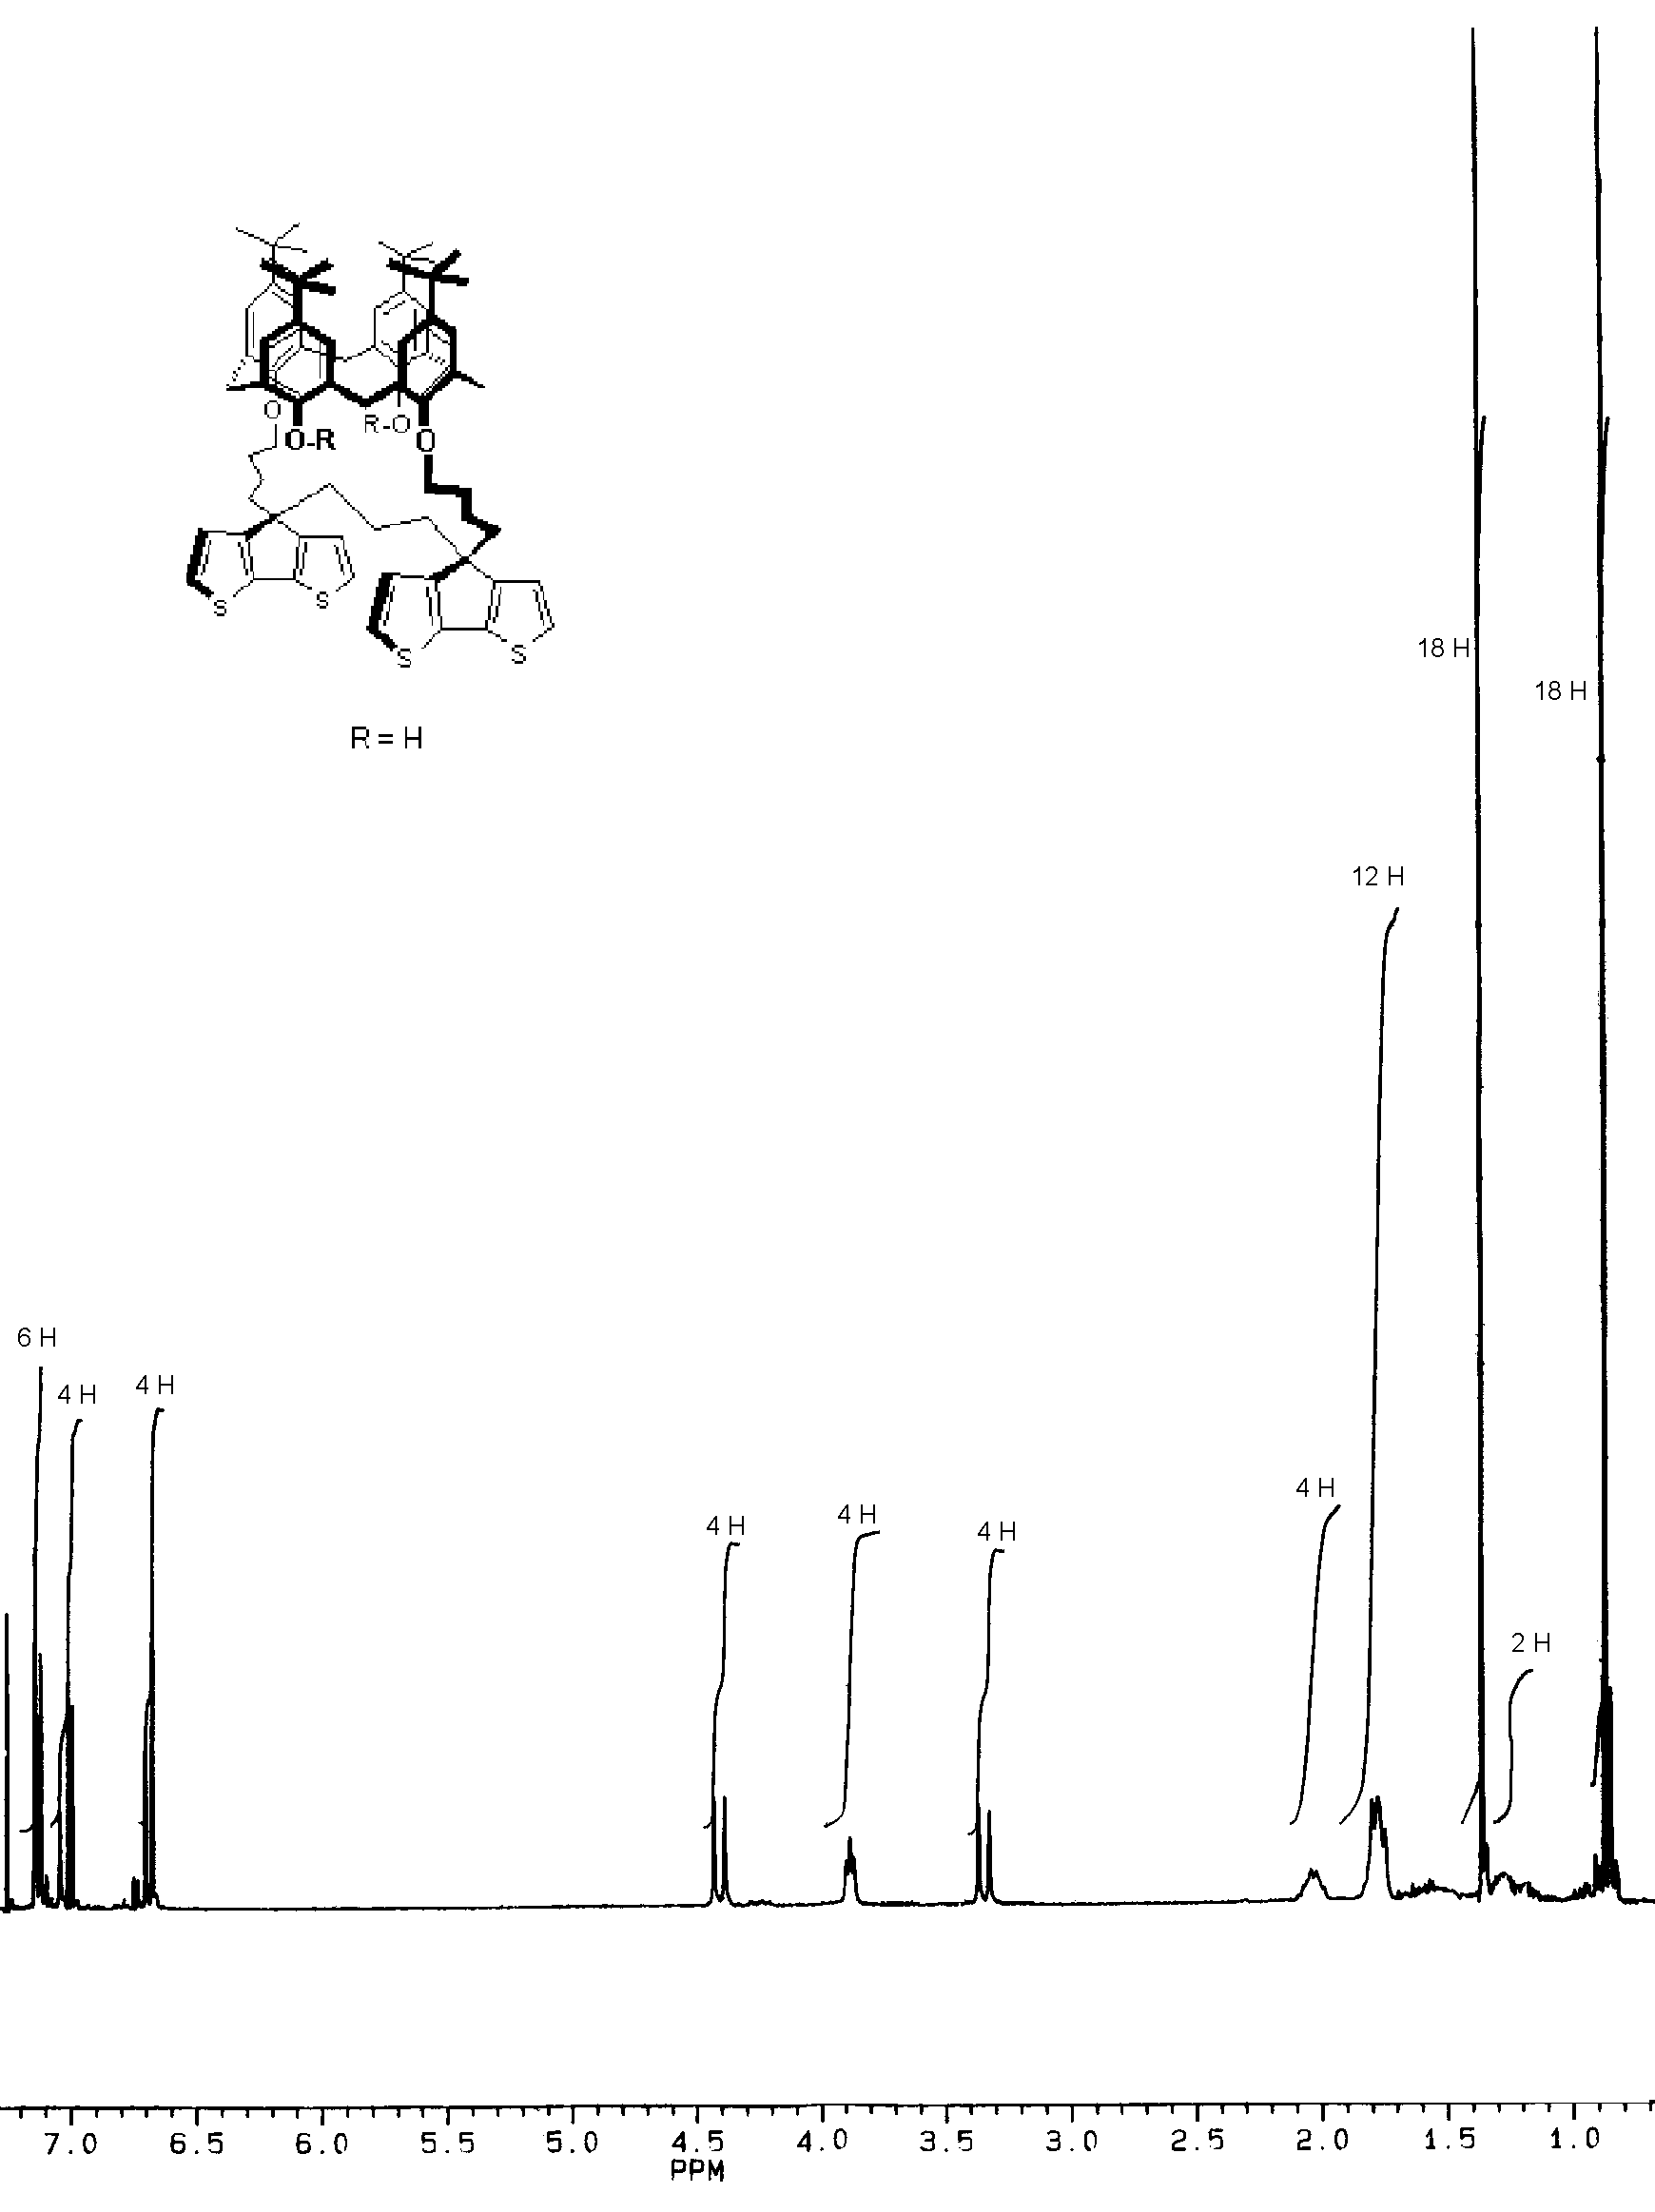


1H-NMR Spectrum of **12** (CDCl3) at 26 °C


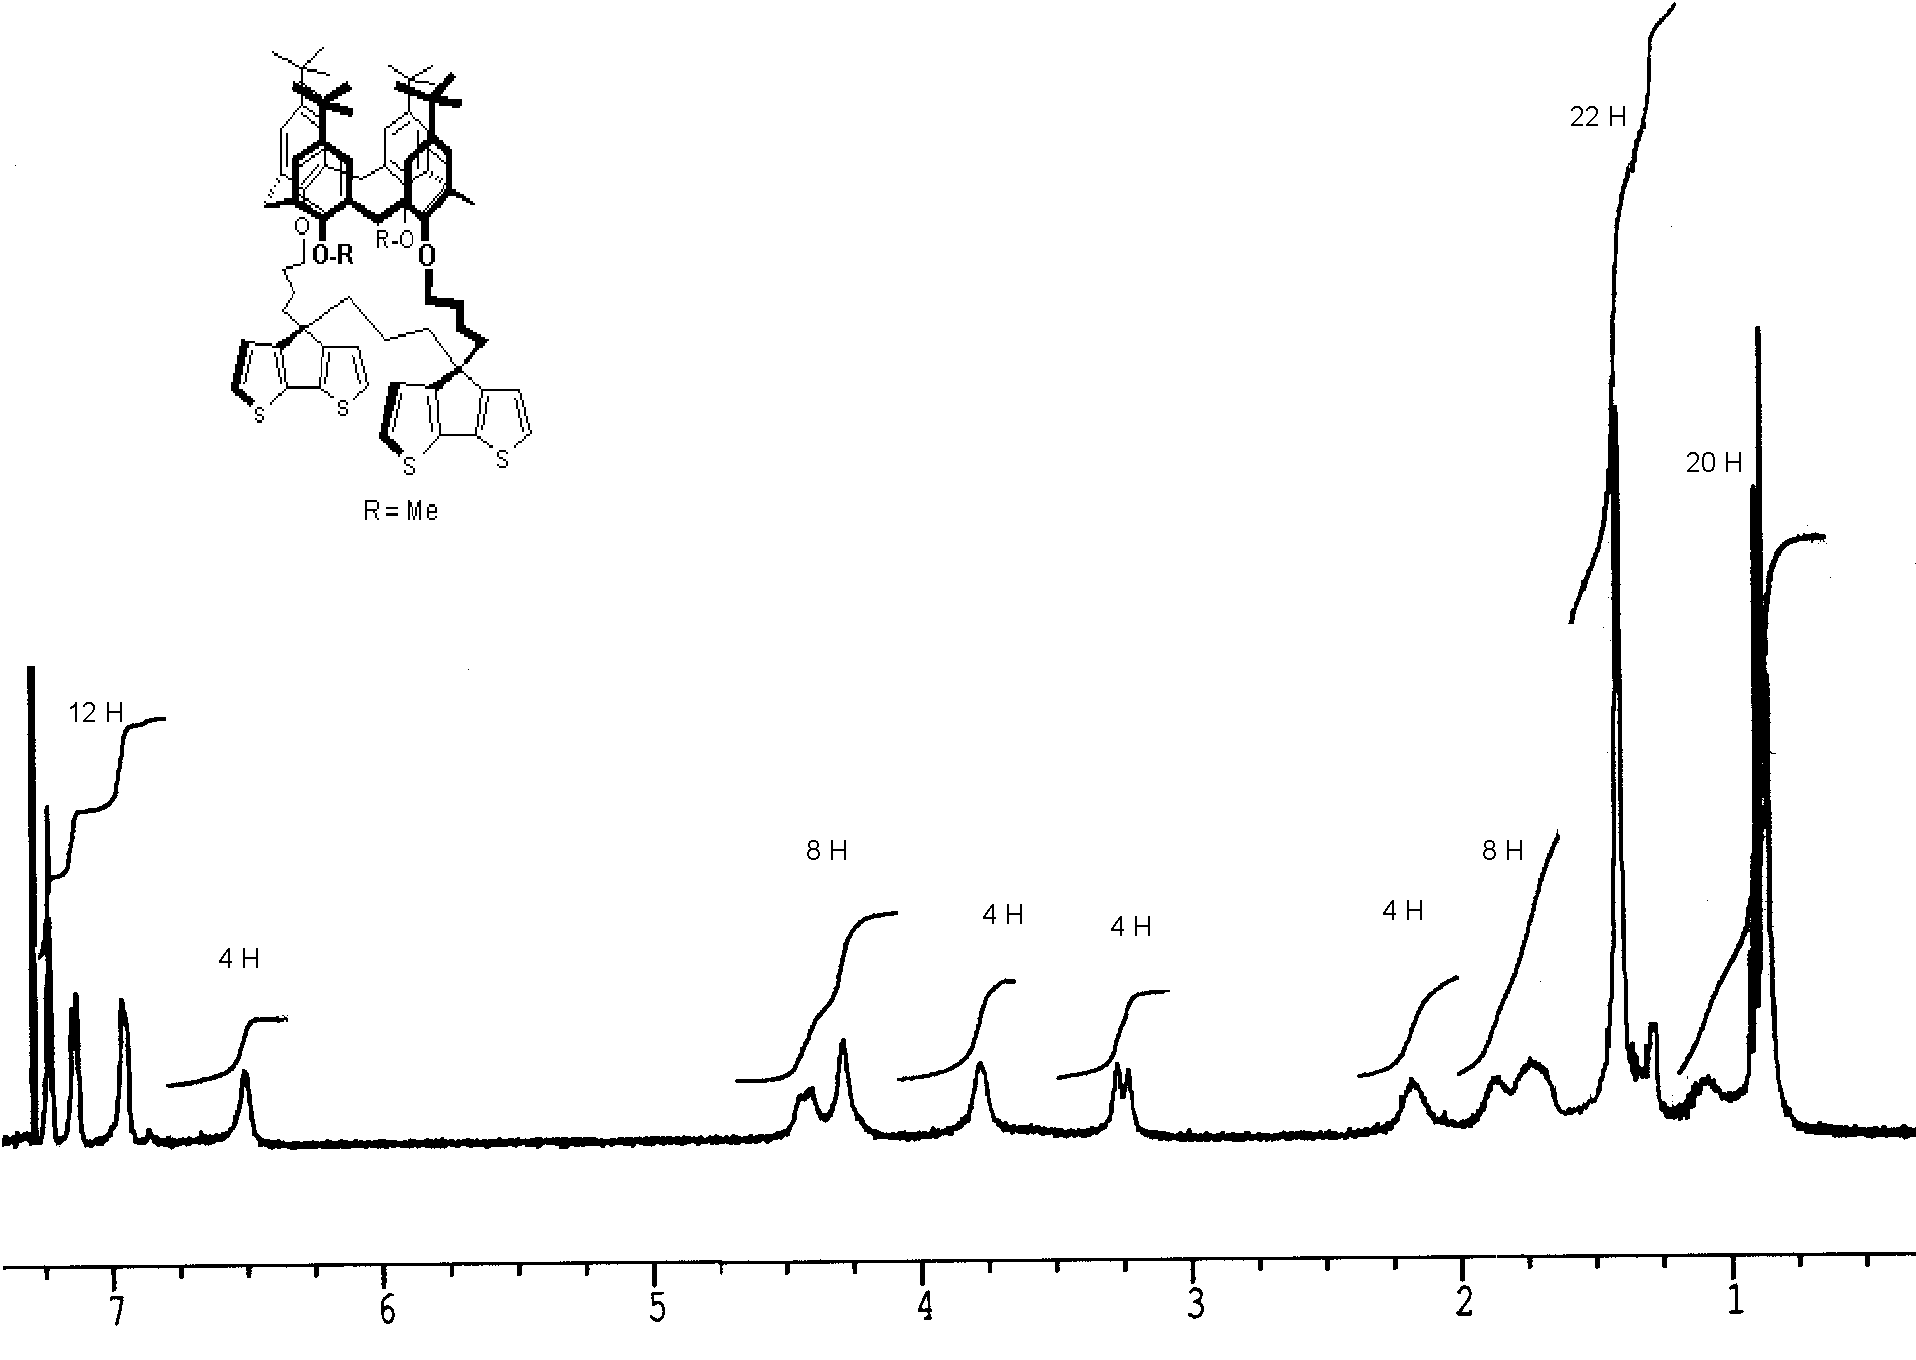


1H-NMR Spectrum of **5** (CDCl3) at 26 °C

*Reaction of 4-(3-bromopropyl)cyclopenta [2,1-b;3,4-b’] bithiophene* (**6**) *with 5,11,17,23-tetra-tert-butyl-25, 27-dimethoxy-26, 28-dihydroxycalix[4]arene* (**3b**). *Synthesis of* (**4**) *and* (**9**). A 60% NaH slurry in mineral oil (400 mg, 10 mmol) was added to a stirred suspension of the calixarene dimethylether **3b** (6.76 g, 10 mmol) in dry DMF (100 mL) under nitrogen at 35°C. After 10 minutes stirring, a solution of the bromoderivative **6** (280 mg, 10 mmol) in dry DMF (20 mL) was added. The mixture was heated at 50°C for 1 hour, then the solvent was removed under reduced pressure and the residue treated with CH2Cl2 and H2O. The residue obtained from the organic layer, after the usual work-up, was treated with MeOH to give a solid, which was flash chromatographed (petroleum ether: CH2Cl2 - 75: 25). The first fraction eluted gave some spiro[2,4]([6,5-b;7,8-b’]dithieno)heptane. Intermediate fractions gave the dialkylated calixarene **4** (0.5 g, yield 5%) as a colorless solid with mp = 135 °C. 1H NMR (300 MHz, CDCl3)  7.15 (d, *J* = 5.00 Hz, 8H, H-thiophene), 7.20-6.95 (broad m, 8H), 6.55-6.35 (broad, 4H, H-Ar), 4.40-4.15 (broad, 2H, 2 CH2-Ar), 4.15-3.95 (broad, 2H, 2 CH2-Ar), 3.95-3.51 (broad, 12H, 2 CH, 2 CH2O and 2 OCH3), 3.50-3.00 (broad, 4H, 2 CH2-Ar), 2.20-1.90 (broad, 8H, 2 CH2CH2CH2O), 1.4 (s, 36H, *t*-Bu); EI-MS *m/z* (relative intensity) 1112. The last fractions eluted gave the monoalkylated calixarene **9** (2.17 g, yield 25%). 1H NMR (300 MHz, CDCl3)  7.30 (d, *J* = 5.70 Hz, 2H,  thiophene), 7.17 (d, *J* = 5.70 Hz, 2H,  thiophene), 7.03 (s, 2H, H-Ar), 7.01 (s, 2H, H-Ar), 6.65 (s, 4H, H-Ar), 6.32 (s, 1H, OH), 4.34 (d, *J* = 12.54 Hz, 2H, CH2-Ar), 4.29 (d, *J* = 13.64 Hz, 2H, CH2-Ar), 3.82 (t, *J* = 8.18 Hz, 2H, CH2O), 3.78 (t, *J* = 7.09 Hz, 1H, CH), 3.72 (s, 6H, OCH3), 3.25 (d, *J* = 12.54 Hz, 2H, CH2-Ar), 3.18 (d, *J* = 13.64 Hz, 2H, CH2-Ar), 2.45 (m, 2H, CH2CH2CH2O), 2.00 (m, 2H, CH2CH2CH2O), 0.90 (s, 36H, *t*-Bu); EI-MS *m/z* (relative intensity) 894. IR: νOH = 3400 cm-1 (broad).

*1,3-Bis[4-(4H-cyclopenta [2,1-b;3,4-b’] bithiophen)yl]propane* (**10**). A 1.6 M BuLi solution in *n*-hexane (3.2 mL, 5 mmol) was dropped into a solution of CPDT (890 mg, 5 mmol) in dry THF (20 mL) at –30°C under nitrogen. Temperature was allowed to rise to –20°C. The solution was maintained at this temperature for 20 minutes, then dropped into a solution of 1,3-dibromopropane (0.25 mL, 2.4 mmol) in dry THF (10 mL) at –70°C under nitrogen. The cooling bath was removed and the mixture left to stand for 2 hours. The solvent was removed under reduced pressure and the residue was treated with H2O and Et2O. The residue obtained from organic layer after the usual work-up was column chromatographed (silica gel/ petroleum ether). The final fractions gave the title product **10** (690 mg, yield 73%). 1H NMR (300 MHz, CDCl3)  7.18 (d, *J* = 7.71 Hz, 4H,  thiophene), 7.00 (d, *J* = 7.71 Hz, 4H,  thiophene), 3.62 (t, *J* = 8.57 Hz, 2H, 2 CH), 1.8 (m, 4H, CH2CH2CH2), 1.65 (m, 2H, CH2CH2CH2).

*1,3-Bis[4-(4-(4-bromobutyl)-cyclopenta[2,1-b;3,4-b’]bithiophen)yl]propane* (**11**). A 1.6 M BuLi solution in *n*-hexane (2.2 mL, 3.5 mmol) was dropped into a solution of **10** (690 mg, 1.74 mmol) in dry THF (15 mL) at –70°C under nitrogen. The mixture is maintained at this temperature for 20 minutes, then dropped into a solution of 1,4-dibromobutane (0.41 mL, 3.5 mmol) in dry THF (10 mL) at –70°C under nitrogen. The cooling bath was removed and the mixture left to stand for 2 hours. The solvent was removed under reduced pressure and the residue was treated with H2O and Et2O. The residue obtained from the organic layer, after the usual work-up, was column chromatographed (silica gel/ petroleum ether: CH2Cl2 - 8: 2) to give the title product **11** (680 mg, yield 73%). 1H NMR (300 MHz, CDCl3)  7.15 (d, *J* = 7.74 Hz, 4H,  thiophene), 6.75 (d, *J* = 7.74 Hz, 4H,  thiophene), 3.18 (t, *J* = 3.87 Hz, 4H, 2 CH2Br), 1.61 (m, 12H, 6 CH2), 0.95 (m, 4H, 2 CH2), 0.75 (m, 2H, CH2).

*Synthesis of* **12**. A mixture of dry K2CO3 (170 mg, 1.23 mmol), **11** (680 mg, 1.02 mmol) and calix[4]arene **3a** (670 mg, 1.03 mmol) in dry CH3CN (35 mL) was refluxed for 20 hours, then filtered and evaporated to dryness. The residue was treated with H2O and CH2Cl2. The residue obtained from the organic layer, after the usual work-up, was column chromatographed (silica gel/ petroleum ether: Et2O - 95: 5). The first fractions eluted were treated with EtOH to give **12** in a pure state (0.17 g, yield 15%) as a colorless solid. 1H NMR (300 MHz, CDCl3)  7.17 (s, 4H, H-Ar), 7.15 (d, *J* = 7.03 Hz, 4H,  thiophene), 7.02 (d, *J* = 7.03 Hz, 4H,  thiophene), 6.70 (s, 2H, 2 OH), 6.69 (s, 4H, H-Ar), 4.41 (d, *J* = 14.06 Hz, 4H, 2 CH2-Ar), 3.90 (t, *J* = 2.81 Hz, 4H, 2 CH2O), 3.35 (d, *J* = 14.06 Hz, 4H, 2 CH2-Ar), 2.06 (m, 4H, 2 CH2), 1.75 (m, 12H, 6 CH2), 1.38 (s, 18H, 2 *t*-Bu), 1.32-1.10 (broad m, 2H, CH2), 0.85 (s, 18H, 2 *t*-Bu); EI-MS *m/z* (relative intensity) 1152.

*Synthesis of* **5**. A 60% NaH slurry in mineral oil (74 mg, 3 mmol) was added to a stirred solution of **12** (170 mg, 0.147 mmol) in dry DMF: THF - 1: 1 (33 mL) under nitrogen at room temperature. After 15 minutes stirring, iodomethane excess (1 mL) was added. The mixture was refluxed for 1.5 hours. Solvent was removed under reduced pressure and the residue treated with H2O and Et2O. The residue obtained from the organic layer, after the usual work-up, was column chromatographed (silica gel/ petroleum ether: CH2Cl2 -95: 5). The first fractions eluted gave monomer **5** in a pure state as a crystalline solid with mp = 141 °C (110 mg, yield 64%). 1H NMR (300 MHz, CDCl3)  7.22 (s, 4H, H-Ar), 7.13 (d, *J* = 4.76 Hz, 4H,  thiophene), 6.94 (d, *J* = 4.76 Hz, 4H,  thiophene), 6.49 (broad s, 4H, H-Ar), 4.42 (d, *J* = 12.69 Hz, 4H, 2 CH2-Ar), 4.28 (broad t, 4H, 2 CH2O), 3.77 (broad s, 6H, 2 OCH3), 3.25 (d, *J* = 12.69 Hz, 4H, 2 CH2-Ar), 2.22 (broad m, 4H, 2 CH2), 1.95-1.65 (broad m, 8H, 4 CH2), 1.60-1.25 (broad m, 4H, 2 CH2), 1.42 (s, 18H, 2 *t*-Bu), 1.07 (broad m, 2H, 2 CH2), 0.88 (s, 18H, 2 *t*-Bu); EI-MS *m/z* (relative intensity) 1180. Elemental analysis: calc for C75 H88S4O4: C 76.23, H 7.50 %; found: C 75.93 H 7.38 %.

*Reaction of 4,4’-bis(3-bromopropyl)cyclopenta [2,1-b] bithiophene* (**7**) *with 5,11,17,23-tetra-tert-butyl-25,27-dimethoxy-26,28-dihydroxycalix[4]arene* (**3b**). A 60% NaH slurry in mineral oil (97 mg, 2.42 mmol) was added to a stirred suspension of the calixarene dimethylether **3b** (76 mg, 1.9 mmol) in dry DMF (70 mL) under nitrogen at room temperature. The mixture was left to stand at room temperature for 20 minutes, then a solution of the dibromoderivative **7** (380 mg, 0.90 mmol) in dry DMF (15 mL) was added. The mixture was heated at 60°C for 1 hour, then the solvent was removed under reduced pressure and the residue treated with Et2O and H2O. The residue obtained from the organic layer, after the usual work-up, was column chromatographed (silica gel/ petroleum ether: Et2O - 95: 5). The intermediate fractions eluted were further purified by flash chromatography (petroleum ether: Et2O - 95: 5) to give the product reported in the scheme below as a solid with mp 133 °C (28 mg, yield = 3%). 1H NMR (300 MHz, CDCl3)  7.20 (s, 4H, H-Ar), 7.10 (d, *J* = 12.00 Hz, 4H, H-thiophene), 6.61 (s, 4H, H-Ar), 6.30 (s, 1H, OH), 4.33 (d, *J* = 13.08 Hz, 2H, CH2-Ar), 4.20 (d, *J* = 12.51 Hz, 2H, CH2-Ar), 3.72 (broad t, 2H, CH2O), 3.64 (s, 6H, 2 OCH3), 3.37 (t, *J* = 6.43 Hz, 2H, CH2Br), 3.26 (d, *J* = 13.08 Hz, 2H, CH2-Ar), 3.13 (d, *J* = 12.51 Hz, 2H, CH2-Ar), 2.3-2.0 (m, 8H, 4 CH2), 1.30, 1.21, 0.86 (3s, 36H, 4 *t*-Bu); EI-MS *m/z* (relative intensity) 1016.

*Reaction of* **9** *with 1,3-dibromopropane.* A 60% NaH slurry in mineral oil (15 mg, 0.40 mmol) was added to a stirred solution of **9** (290 mg, 0.32 mmol) in dry DMF (25 mL) under nitrogen at room temperature. After 10 minutes heating at 40°C, 1,3-dibromopropane excess (2 mL) was added. The mixture was heated at 80°C for 1 hour, then at 90°C for 2 hours. Solvent was removed under reduced pressure and the residue treated with H2O and Et2O. The residue obtained from organic layer after the usual work-up was column chromatographed (silica gel/ petroleum ether: Et2O - 95: 5). The first fractions eluted gave the product reported in the scheme below in a pure state (80 mg, yield = 25%). 1H NMR (300 MHz, CDCl3)  7.3-6.7 (broad, 8H, H thiophene and H-Ar), 6.60-6.30 (broad, 4H, H-Ar), 4.0-3.4 (broad, 13H, 2 CH2-Ar, CH, 2 CH2O and 2 OCH3), 3.40-2.90 (broad, 6H, 2 CH2-Ar and CH2Br), 2.5-2.2 (broad, 2H, CH2), 2.2-1.7 (broad, 4H, 2 CH2), 1.3 (s, 36H, 4 *t*-Bu); EI-MS *m/z* (relative intensity) 1016.
